# Supplementary material for: Tuning energy transfer in switchable donor–acceptor systems
Source: Royal Society of Chemistry journal article supplement (doi:10.1039/b719095f), 2008-01-01
Supplement: b719095f.pdf [file b719095f.pdf]

Electronic Supporting information for:

## Controlling Energy Transfer in Switchable Donor-Acceptor Systems

Johannes H. Hurenkamp, Jaap J.D. de Jong, Wesley R. Browne, Jan H. van Esch and Ben L. Feringa

### Photochromic switching of CSC 5 and PSC 10 over several cycles

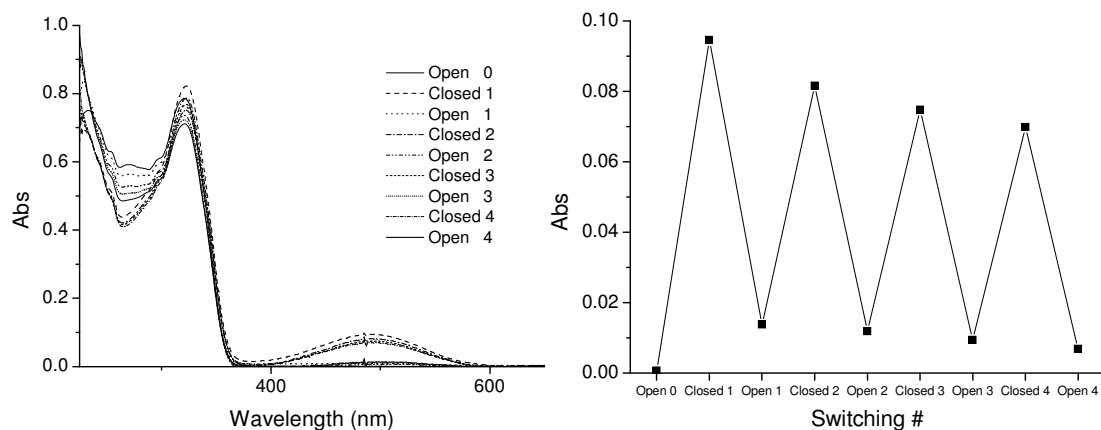

Left: Absorption spectrum of CSC 5 before and after photochemical ring closure ( $\lambda_{exc} > 312$  nm) and opening ( $\lambda_{exc} > 400$  nm). Irradiation was carried out at 220 K in  $CH_2Cl_2$ . Right: Absorption at  $\lambda = 493$  nm plotted against number of times switched.

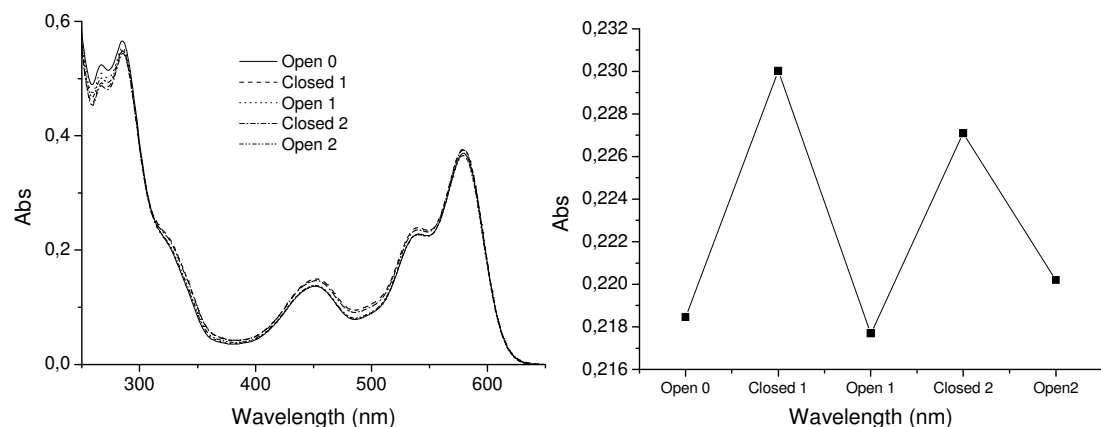

Left: Absorption spectra of PSC 10 before and after switching from PSC open to PSC PSS, irradiated with  $\lambda = 312$  nm at 220K and  $\lambda > 400$  nm light at RT in  $CH_2Cl_2$  respectively. Right: Absorption at 493 nm plotted over three switching cycles of PSC using  $\lambda = 312$  nm light at 220K to close and  $\lambda > 400$  nm at RT to ring-open the dithienylcyclopentene unit. Measurements were performed in  $CH_2Cl_2$  and spectra were recorded at RT.

### Effect of irradiation of PSC **10** at $\lambda = 254$ nm

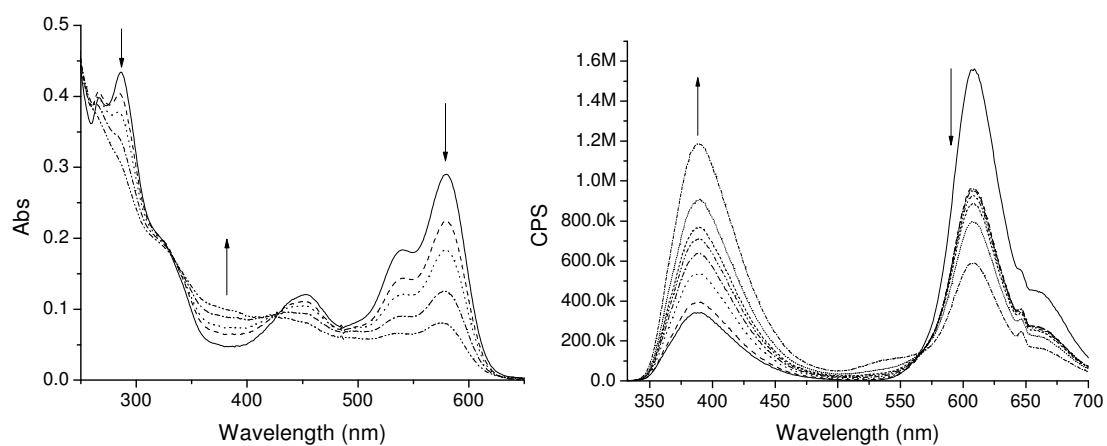

Left: The change in the absorption spectrum of PSC **10** upon irradiation over 20 min with  $\lambda = 254$  nm light in  $\text{CH}_2\text{Cl}_2$  at RT. Right: The change in emission spectra ( $\lambda_{\text{ex}} = 322$  nm) of PSC **10** by irradiation over 18 min with  $\lambda = 254$  nm light in  $\text{CH}_2\text{Cl}_2$  at RT.
